# Supplementary material
Source: publisher figshare collection journal article supplement (https://acs.figshare.com/ndownloader/files/3905872)
Supplement: Supplementary file 1 [file 3905872]

# Reduced UV-induced Reverse Current and Higher $V_{OC}$ in ZnO-based Solar Cells by a Chemically Modified Blocking Layer

*Eran Edri<sup>1</sup>, Nir Kedem<sup>1</sup>, Hagai Cohen<sup>2</sup>, Piers Barnes<sup>3</sup> and Gary Hodes<sup>1</sup>*

<sup>1</sup>Dept. of Materials and Interfaces. Weizmann Institute of Science, Rehovot 76100, Israel.

<sup>2</sup>Dept. of Chemical Research Support. Weizmann Institute of Science, Rehovot 76100, Israel.

<sup>3</sup>Department of Chemistry, Imperial College London, London SW7 2AZ, UK

## Supporting Information.

Different compact layers.

Current-Voltage curves of ZnO\CdS\CuSCN solar cells with different compact layers, namely spin-coated ZnO (thin blue lines), natively grown ZnO (std-ZnO; red lines) and Sb incorporated compact layer (dl-ZnO; thick green lines). The increase in voltage in dl-ZnO cells is clearly seen, while the current does not change significantly.

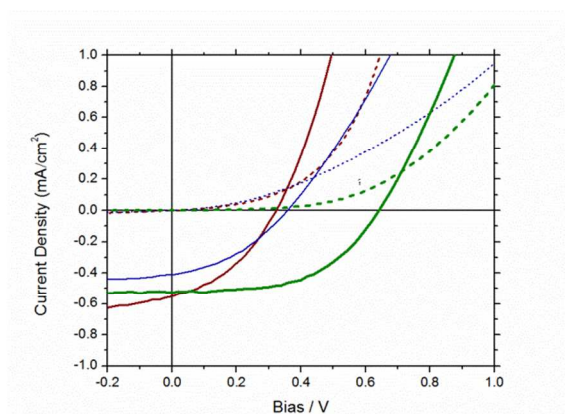

Figure S1. J-V curve of ZnO\CdS\CuSCN cells with spin coated ZnO compact layer (thin; blue lines), natively grown ZnO dense layer (std-ZnO; medium thickness; red lines), Sb incorporated ZnO compact layer (thick; green lines).
